# Supplementary material for: Small intestinal γδ T17 cells promote C1q-mediated SAE by synaptic pruning in mice
Source: Research Square preprint supplement (doi:10.21203/rs.3.rs-5152680/v1), 2024-10-23
Supplement: Supplementary file 1 [file ed26119bf09e58aae25de77d.docx]

**Extended data table 1.**

**Key resources table**

| **Reagent or resource** | **Company** | **Identifier** |
| --- | --- | --- |
| **Antibodys** |  |  |
| Iba-1 | Abcam | Cat# ab283319; RRID:AB_2924797 |
| Iba-1 | Abcam | Cat# ab178846; RRID:AB_2636859 |
| SYN | Proteintech | Cat# 17785-1-AP; RRID:AB_2271365 |
| PSD95 | Abcam | Cat# ab18258; RRID:AB_444362 |
| PSD95 | CST | Cat# 37657; RRID:AB_2943447 |
| C1q | Proteintech | Cat#11602-1-AP; RRID:AB_2067153 |
| C1q | GeneTex | Cat#GTX54404 |
| cGAS | Proteintech | Cat# 26416-1-AP; RRID:AB_2880507 |
| STING | Proteintech | Cat# 19851-1-AP; RRID:AB_10665370 |
| β-actin | Proteintech | Cat# 66009-1-Ig; RRID:AB_2687938 |
| GAPDH | Proteintech | Cat# 60004-1-Ig; RRID:AB_2107436 |
| MUC-2 | Proteintech | Cat# 27675-1-AP; RRID:AB_2880943 |
| ZO-1 | Proteintech | Cat# 21773-1-AP; RRID:AB_10733242 |
| Occludin | Proteintech | Cat# 27260-1-AP; RRID:AB_2880820 |
| PerCP-Cy™5.5 Rat Anti-Mouse CD45 | BD Biosciences | Cat# 550994; RRID:AB_394003 |
| FITC Rat Anti-CD11b | BD Biosciences | Cat# 561688; RRID:AB_10898180 |
| APC Rat anti-Mouse CD86 | BD Biosciences | Cat# 558703; RRID:AB_2075114 |
| BV421 Rat Anti-Mouse F4/80 | BD Biosciences | Cat# 565411; RRID:AB_2734779 |
| BV650 Hamster Anti-Mouse CD11c | BD Biosciences | Cat# 564079; RRID:AB_2725779 |
| CD206-BV605 | Biolegend | Cat# 141721; RRID:AB_2562340 |
| Fixable Viability Stain 510 | BD Biosciences | Cat# 564406; RRID:AB_2869572 |
| PE-Cy™7 Hamster Anti-Mouse CD3e | BD Biosciences | Cat# 552774; RRID:AB_394460 |
| APC Anti-mouse TCR γ/δ | Biolegend | Cat# 118115 (also 118116); RRID:AB_1731824 |
| Brilliant Violet 421™ anti-mouse IL-17A | Biolegend | Cat# 506925 (also 506926); RRID:AB_10900442 |
| IL-7R-BV605 | Thermofisher | Cat# 416-1271-82; RRID:AB_2929104 |
| CD8a-APC/Fire750 | Sigma-Aldrich | Cat# 100766 (also 100765); RRID:AB_2572113 |
| Purified Rat Anti-Mouse CD16/CD32 | BD Biosciences | Cat# 553141; RRID:AB_39465 |
| Purified Hamster Anti-Mouse TCR γδ (GL4) | BD Biosciences | Cat# 553180; RRID:AB_394690 |
| Goat Anti-Rabbit IgG H&L (Alexa Fluor® 488) | Abcam | Cat# ab150077; RRID:AB_2630356 |
| Goat Anti-Mouse IgG H&L (Alexa Fluor® 594) | Abcam | Cat# ab150116; RRID:AB_2650601 |
| Goat Anti-Rabbit IgG H&L (HRP) | Abcam | Cat# ab205718; RRID:AB_2819160 |
| Goat Anti-Mouse IgG H&L (HRP) | Abcam | Cat# ab205719; RRID:AB_2755049 |
| **Chemicals; recombinant proteins** |  |  |
| 4-Octyl itaconate | MCE | Cat# HY-112675 |
| lipopolysaccharide | Sigma-Aldrich | Cat# L2880 |
| H151 | MCE | Cat# HY-112693 |
| Zoledronic acid monohydrate | Sigma-Aldrich | Cat# SML0223 |
| PLX3397 | Selleck | Cat# S7818 |
| MG132 | MCE | Cat#HY-13259 |
| β-mercaptoethanol | MCE | Cat# HY-Y0326 |
| ethidium bromide | Sigma‐Aldrich | Cat# E7637 |
| uridine | Sigma‐Aldrich | Cat# U3750 |
| pyruvic acid | Sigma‐Aldrich | Cat# W297003 |
| tamoxifen | MCE | Cat# HY-13757A |
| Recombinant Mouse IL-17A Protein | Abclonal | Cat# RP01460 |
| Recombinant Mouse IL-2 Protein | Abclonal | Cat# RP02771LQ |
| Recombinant Mouse IL-7 Protein | Abclonal | Cat# RP01766 |
| **Critical commercial assays** |  |  |
| TCR g/d cell isolation kit | Miltenyi | Cat# 130-092-125 |
| SOD（Total Superoxide Dismutase Assay Kit with WST-8） | Beyotime | Cat# S0101S |
| MDA（Lipid Peroxidation MDA Assay Kit） | Beyotime | Cat# S0131S |
| Dihydroethidium | Beyotime | Cat# S0063 |
| QuantiCyto® Mouse IL-17/IL-17A ELISA kit | Neobioscience | Cat# EMC008.96 |
| Abplex Mouse Cytokine 8-Plex Assay Kit | Abclonal | Cat# RK04836 |
| Cell MeterTMFluorimetric Phagocytosis Assay Kit | AAT Bioquest | Cat# 21225 |
| Thermo Scientific Syn-PER | Thermofisher | Cat# 87793 |
| Mitochondrial Membrane Potential Assay Kit (with JC-1) | Elabscience | Cat# E-CK-A301 |
| Lipofectamine 3000 | Thermofisher | Cat#L3000015 |
| Lipofectamine RNAiMAX | Thermofisher | Cat#13778100 |
| mouse lymphatic separation solution | Dayou | Cat#7211011 |
| **Virus** |  |  |
| rAAV-SFFV-DIO-cGAS-2a-EGFP-WPREs | BrainVTA | Cat# PT-9226 |
| rAAV-SFFV-DIO-EGFP-WPREs-hGH | BrainVTA | Cat# PT-7151 |
| rAAV-SFFV-DIO-rnf5-his-2a-EGFP-WPREs | BrainVTA | Cat# PT-10223 |
| rAAV-SFFV-DIO-H2B-2a-EGFP | BrainVTA | Cat# PT-8614 |
| rAAV-CMV-DIO-(EGFP-U6)-shRNA1(Acod1)-WPRE-hGH pA | BrainVTA | Cat# PT-9213 |
| rAAV-CMV-DIO-(EGFP-U6)-shRNA(scramble)-WPRE-pA | BrainVTA | Cat# PT-2644 |
| rAAV-SFFV-DIO-sting1(K150R)-2a-EGFP-WPREs | BrainVTA | Cat# PT-10226 |
| pcADV-EF1-mNeonGreen-CMV-Il17a-3xFLAG | Obio | Cat# H27226 |
| pAdeno-EF1A(S)-mNeonGreen-CMV-MCS-3FLAG | Obio | Cat# H12588 |
| **Plasmid** |  |  |
| pCDNA3.1-CMV-Tmem173(K150R)-3xFLAG-hGHpolya-EF1a-EGFP | OBIO | Cat# H35742 |
| pCDNA3.1-CMV-Tmem173(K151R)-3xFLAG-hGHpolya-EF1a-EGFP | OBIO | Cat# H35743 |
| pCDNA3.1-CMV-Tmem173(K235R)-3xFLAG-hGHpolya-EF1a-EGFP | OBIO | Cat# H35746 |
| pCDNA3.1-CMV-Tmem173(K288R)-3xFLAG-hGHpolya-EF1a-EGFP | OBIO | Cat# H35745 |
| pCDNA3.1-CMV-Tmem173(K275R)-3xFLAG-hGHpolya-EF1a-EGFP | OBIO | Cat# H35744 |
| pCDNA3.1-CMV-Tmem173(K127R)-3xFLAG-hGHpolya-EF1a-EGFP | OBIO | Cat# H35741 |
| pCDNA3.1-CMV-Tmem173(K37R)-3xFLAG-hGHpolya-EF1a-EGFP | OBIO | Cat# H35740 |
| pCDNA3.1-CMV-Rnf5-3xFLAG-hGHpolya-EF1a-EGFP | OBIO | Cat# H35747 |
| pCDNA3.1-CMV-MCS-3xFLAG-hGHpolya-EF1a-EGFP | OBIO | Cat# H23990 |
